# Supplementary material
Source: Elsevier journal article supplement (https://infoscience.epfl.ch/record/175860/files/mmc1.doc)
Supplement: mmc1 [file mmc1.doc]

Fabrication of Soft Gold Microelectrode Arrays as Probes for Scanning Electrochemical Microscopy

--Electronic Supporting Information--

Andreas Lesch,a Dmitry Momotenko,b Fernando Cortés-Salazar,b Ingo Wirth,c Ushula Mengesha Tefashe,a Frank Meiners,a Britta Vaske,a Hubert H. Giraultb and Gunther Wittstocka,*.

a Carl von Ossietzky University of Oldenburg, Faculty of Mathematics and Natural Sciences, Center of Interface Science, Department of Pure and Applied Chemistry, D-26111 Oldenburg, Germany

b Ecole Polytechnique Fédérale de Lausanne, Laboratoire d’Electrochimie Physique et Analytique, Station 6, CH-1015 Lausanne, Switzerland

c Fraunhofer Institute for Manufacturing Technology and Applied Materials Research (IFAM), Wiener Strasse 12, D-28359 Bremen, Germany

RECEIVED DATE (to be automatically inserted after your manuscript is accepted if required according to the journal that you are submitting your paper to)

* CORRESPONDING AUTHOR FOOTNOTE

EMAIL: gunther.wittstock@uni-oldenburg.de

Telephone number: +49(0)-441-798-3971

Fax number: +49(0)-441-798-3979

**SI-1. Scheme of soft probe mounting and movement**

Figure SI-1. Schematic representation of soft probe mounting to the custom made holder and direction of motor movement during approach curves and line scans in contact and contactless mode.

In order to qualify the bending of the array a vertical height *h*P = *h*A - *l*T was defined which is the vertical difference between the height of the attachment point above the sample *h*A and the vertical length of the array *l*T. Therefore, *h*P becomes negative when the probe touches the sample and is approached further. The working distance *d* is then defined as

(SI-1-1)

(SI-1-2)

where ** represents the angle between sample surface and cross-section of the probe and *t*L is the thickness of the covering polymer layer. Line scans in contact and contactless modes and approach curves are performed as depicted by the arrows in Fig. SI-1.

**SI-2. Shear force and AFM images of spikes on pure Kapton HN® film as real features**


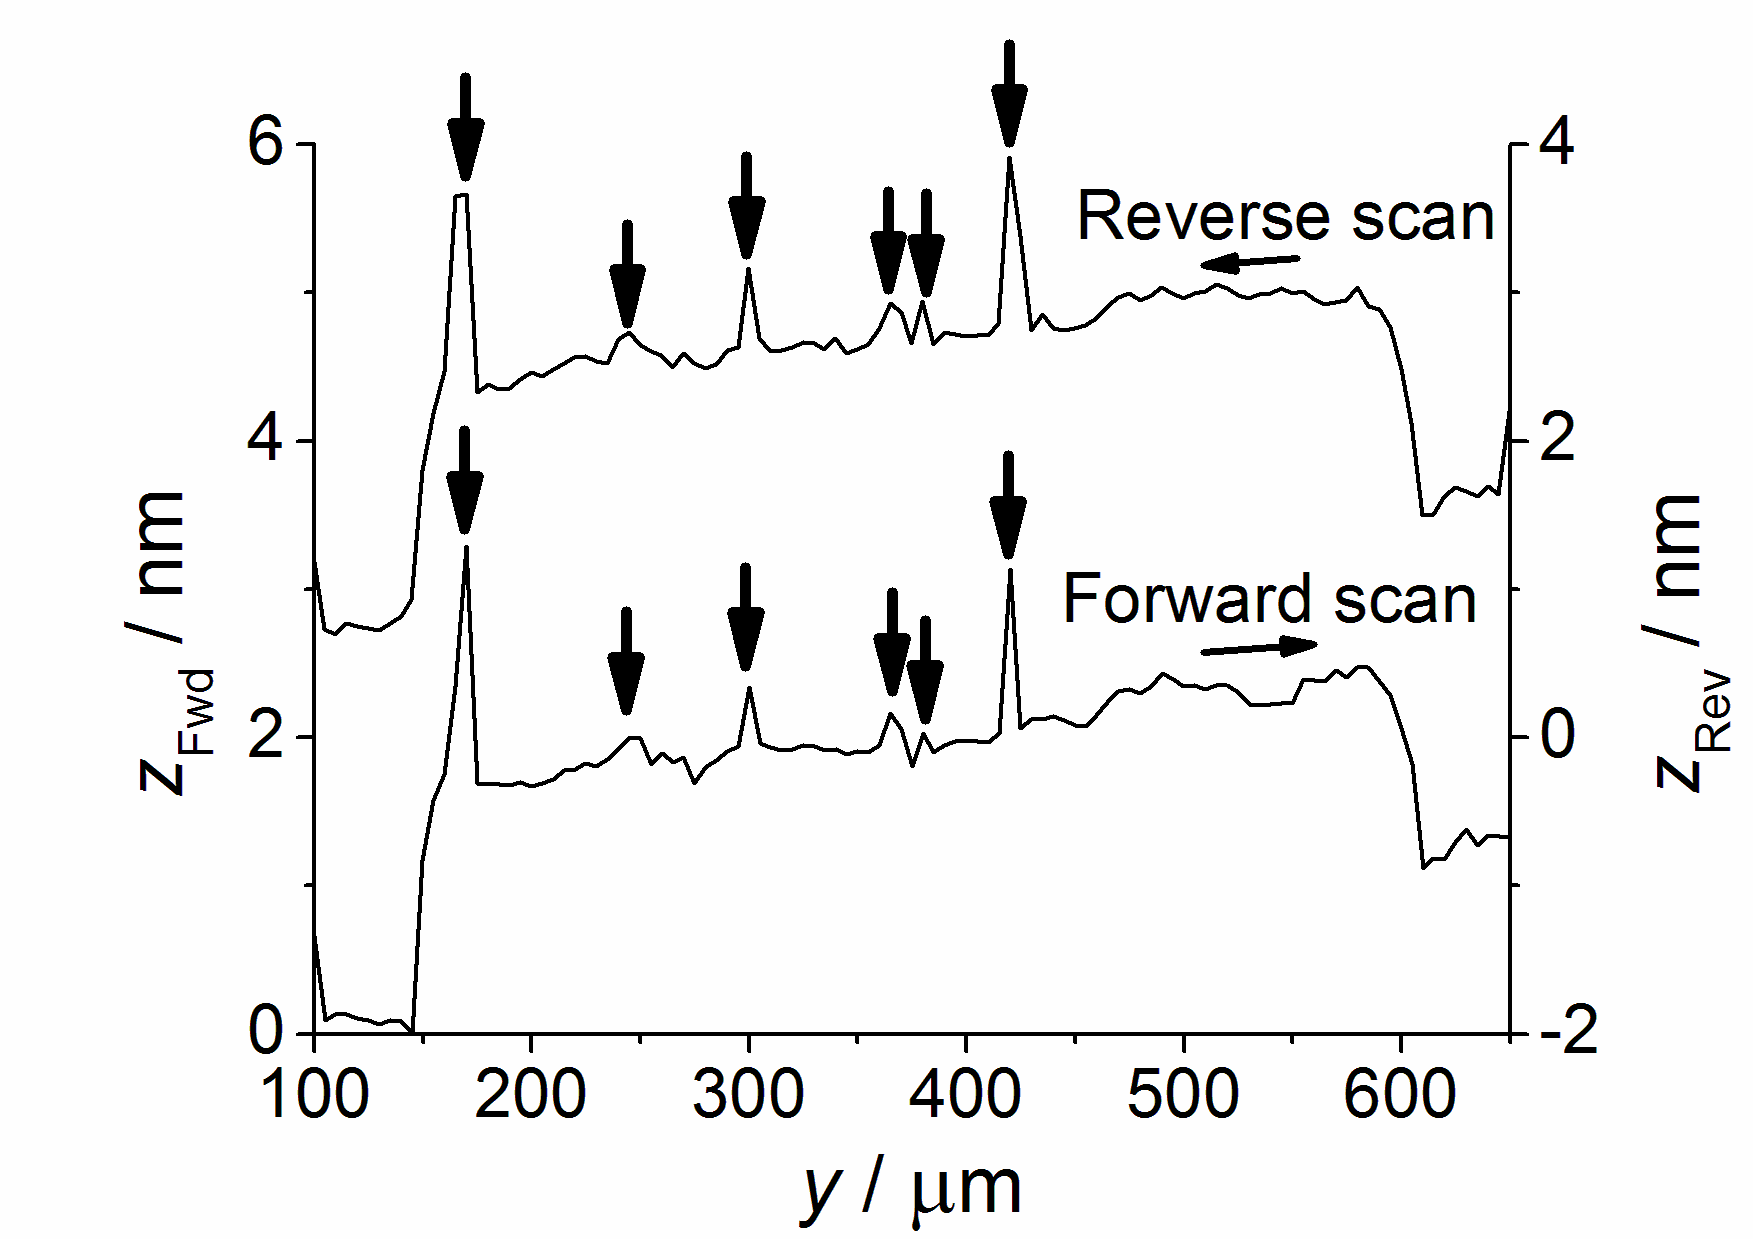


Figure SI-2-1. Topographic forward and reverse line scan of the same area of the sintered gold tracks on polyimide thin film by shear-force based SECM in aqueous 2 mM FcMeOH and 0.1 M KNO3, *E*T = 0.3 V, translation rate 25 µm s-1, step size 5 µm. Significant spikes are indicated by vertical arrows and are located at the same *y* positions.

A plot of topographic data from a shear force SECM forward and reverse line scan over the same area is shown in Fig. SI-2-1. The spikes over the polymeric material are indicated by vertical arrows. It can be seen clearly that the spikes are located exactly at the same *y* positions. Also in an AFM image of a 100 µm × 100 µm area of pure Kapton HN® film plotted as a 3D and 2D plot these spikes can be seen clearly (Fig. SI-2-2) and are about the same scale of up to approximately 1 µm. Therefore, they are considered as real features of the polyimide film after curing (as opposed to scatter in the data).

| a) | 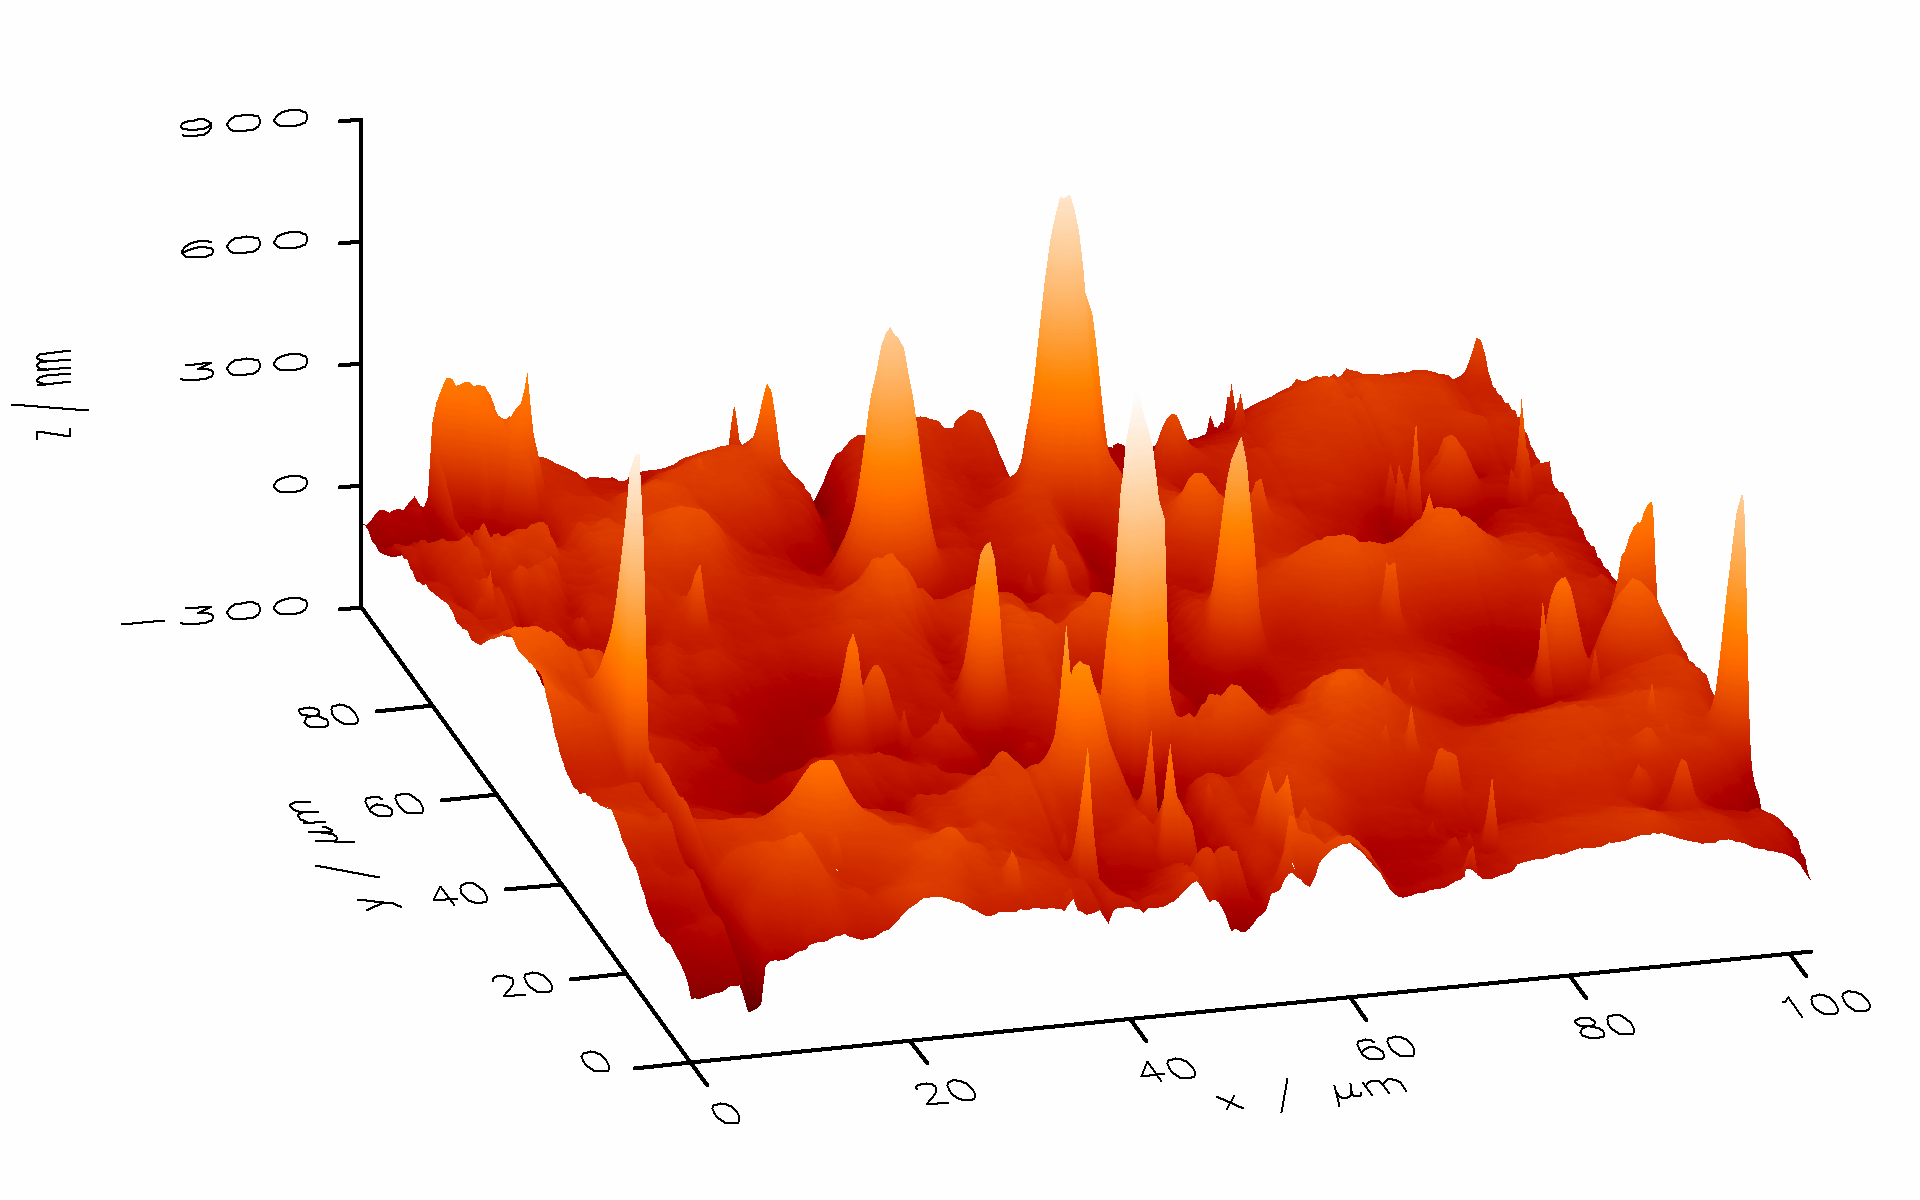 |
| --- | --- |
| b) | 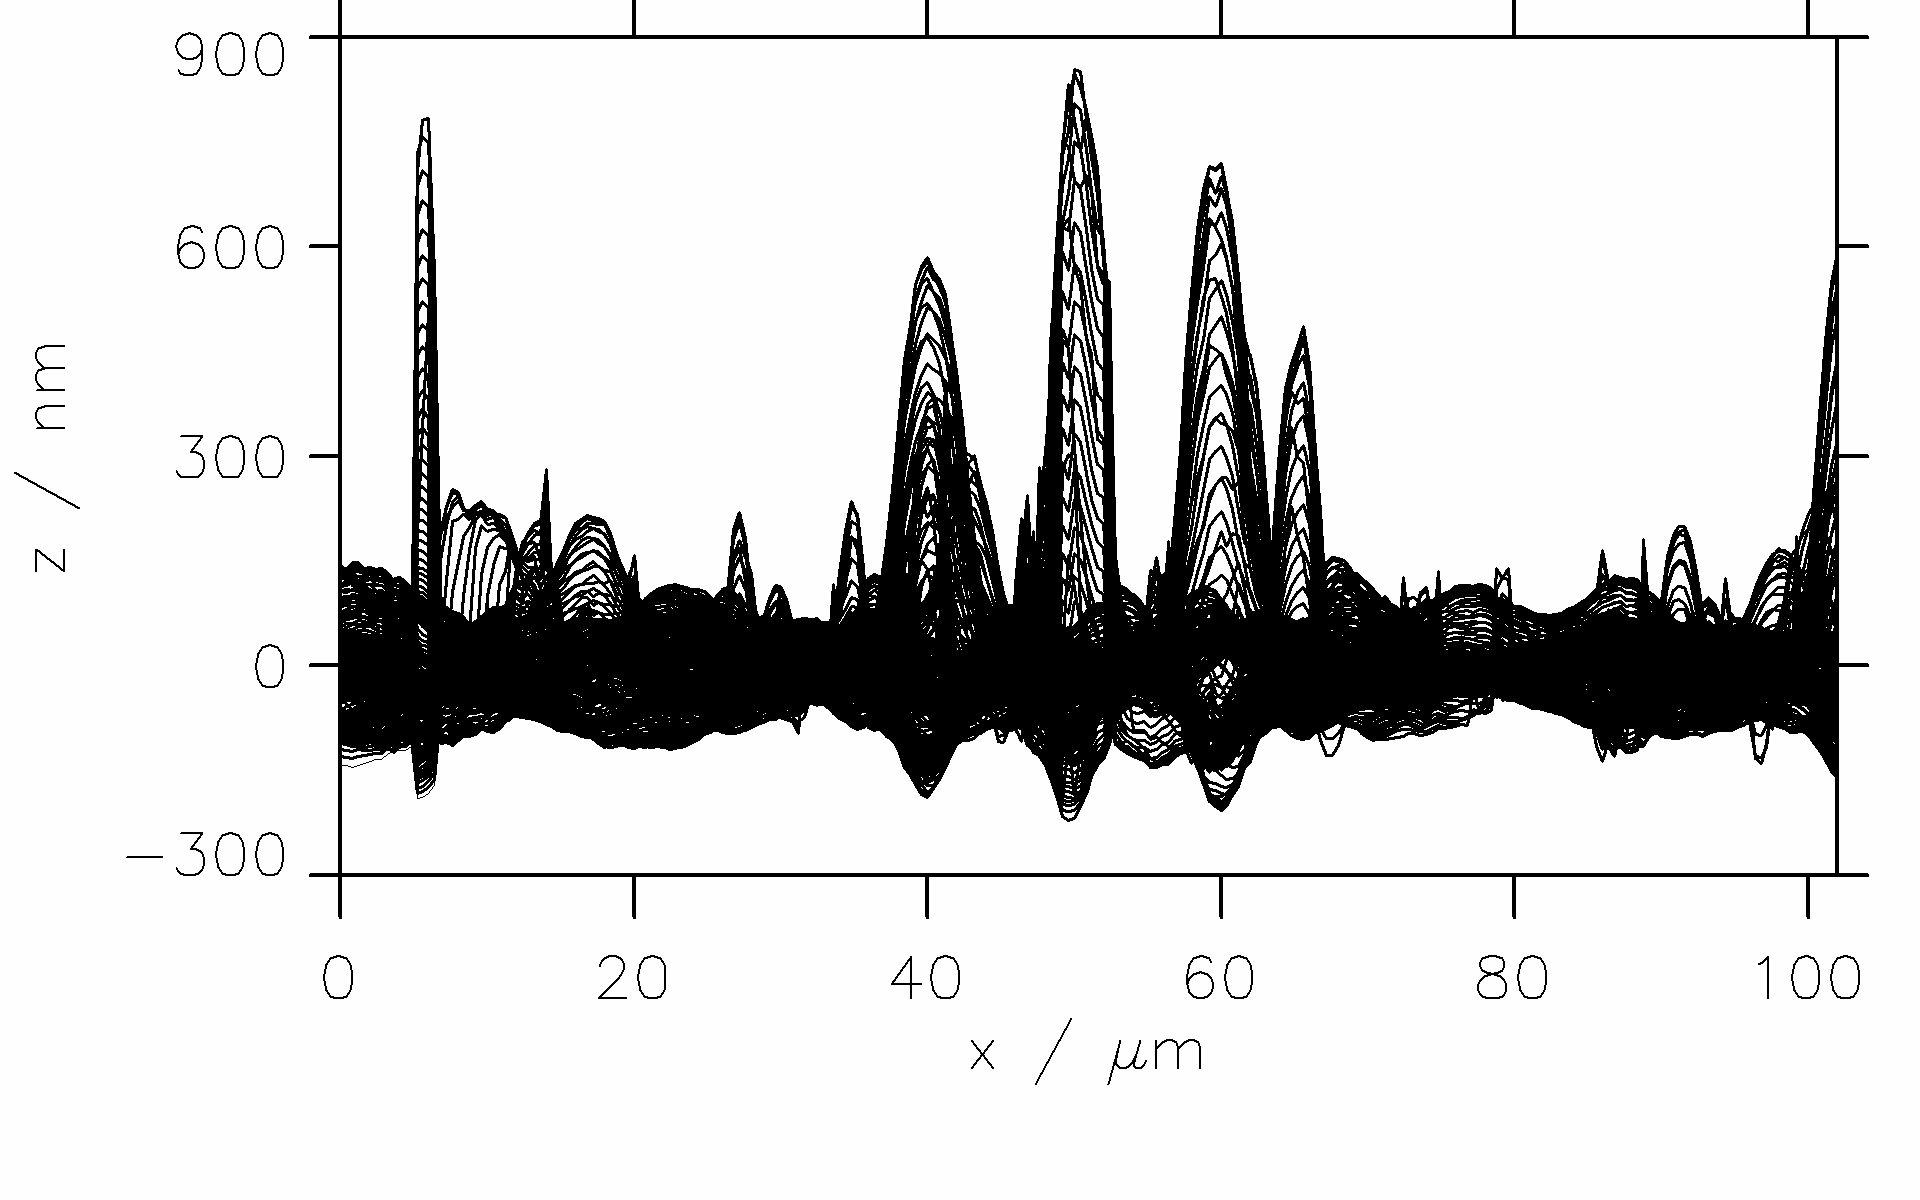 |

Figure SI-2-2. (a) Topographic AFM image of a pure Kapton HN® area. (b) Multiple 2D plot of all performed line scans.

**SI-3. Wave-slope analysis of the cyclic voltammograms of the array electrodes *k* for a reversible system**


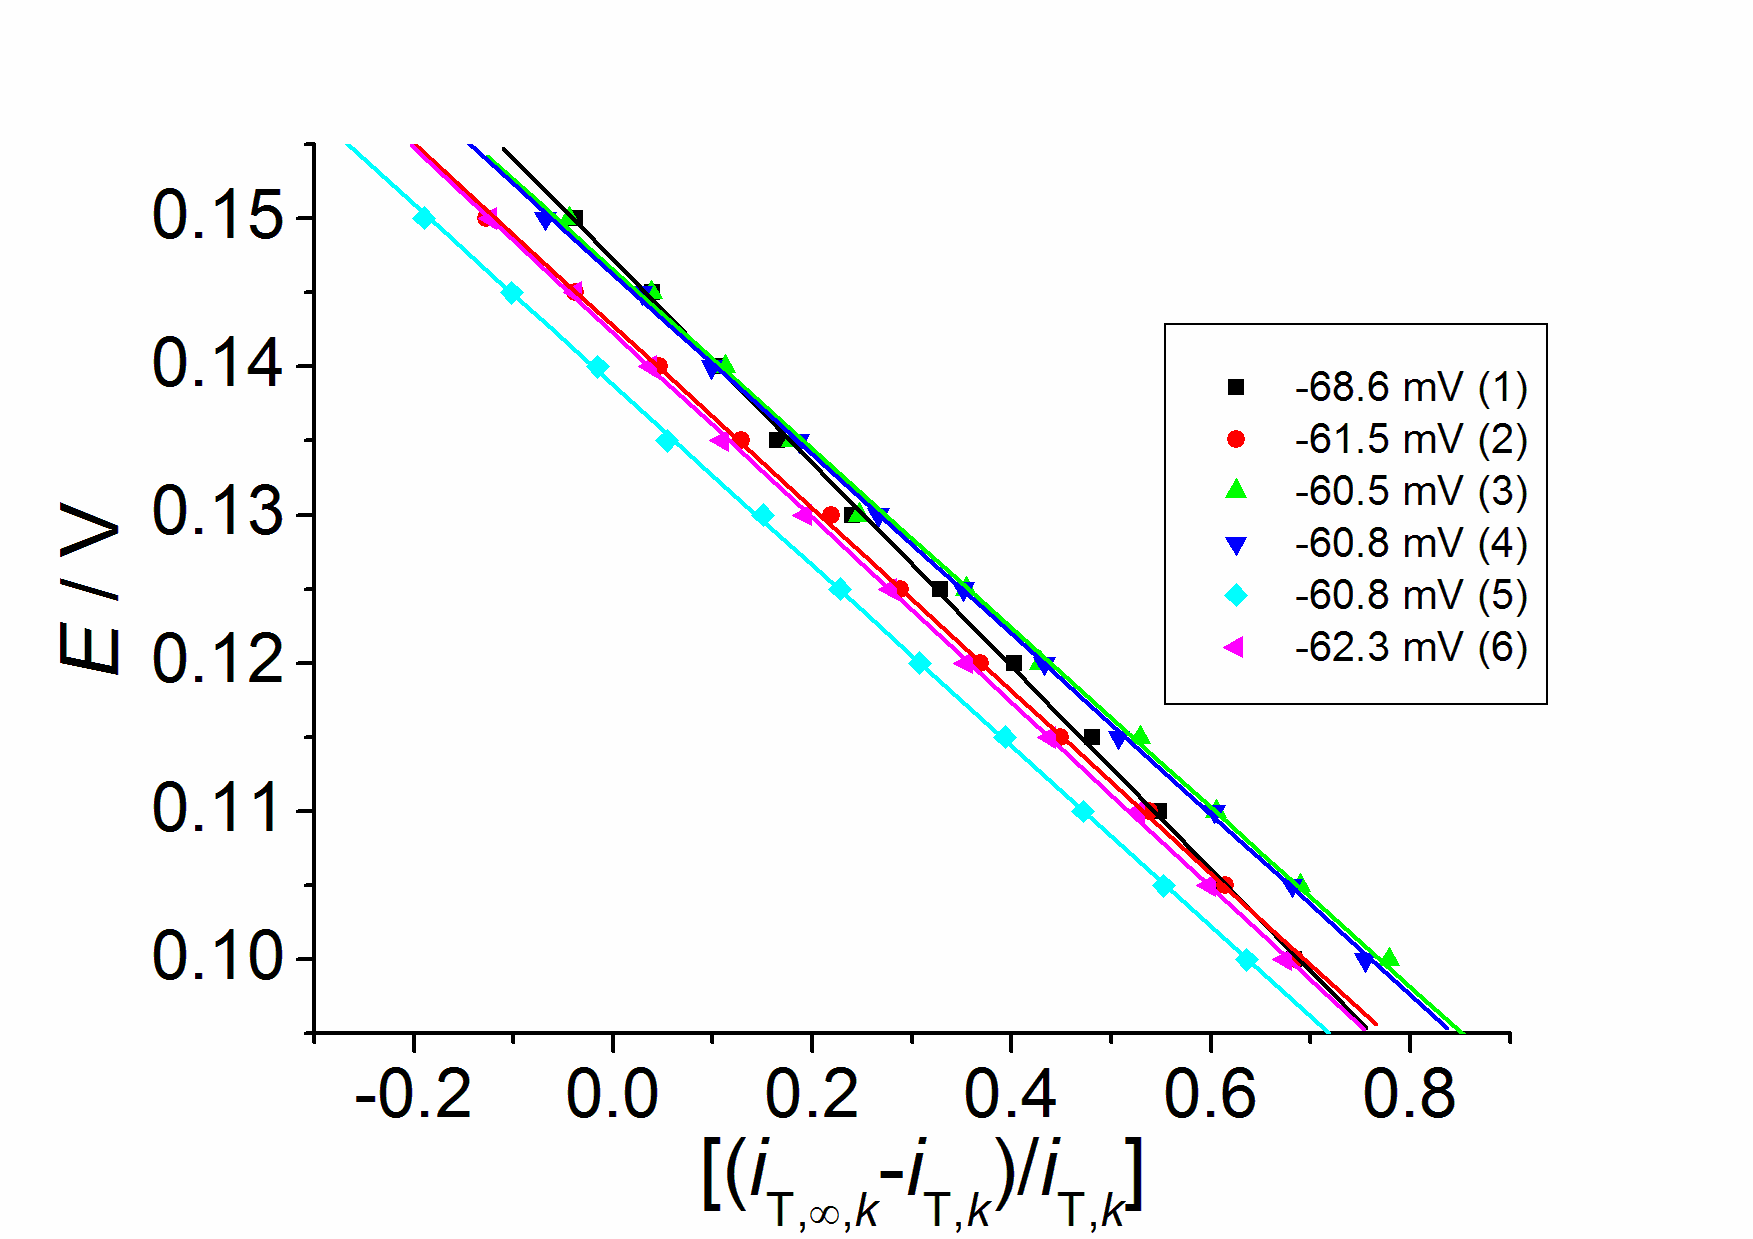


Figure SI-3. *E* plotted vs. [(*i*T,∞,*k*- *i*T,*k*)/*i*T,*k*] as wave-slope analysis for a reversible system of the six gold microelectrodes of one array. The legend shows the symbol, the slope of the fitted straight lines. Number in brackets is the index *k* of the individual electrode within the array.

A wave-slope analysis of the performed CVs can be done by plotting the potentials which refer to the slope between 0.1 V and 0.15 V against [(*i*T,∞,*k*- *i*T,*k*)/*i*T,*k*]. A theoretical slope with an absolute value of ­59.1 mV indicates a reversible system [1]. The calculated slopes of -68.6 mV, -61.5 mV, -60.5 mV, -60.8 mV, -60.8 mV and -62.3 mV from Fig. SI-3 have a slightly larger absolute value than expected for a reversible system due to the internal electronic resistance of the printed gold structure and limitations of the electron transfer rate at the exposed gold structure.

**SI-4. FEM simulation of steady-state current**

The computational model assumes the probe (parallelepiped with dimensions 125 µm × 1000 µm × 1000 µm) in a box-shaped domain (2000 µm × 2000 µm × 2000 µm) that represents the solution bulk (Figure. SI-4). The active area of the microelectrode was approximated to a rectangle (*i.e.* 1.67 µm depth and 40 µm width) taken as representative from microscopic images of the cross-section of individual electrodes of the array (Figure. 3a of the main manuscript).


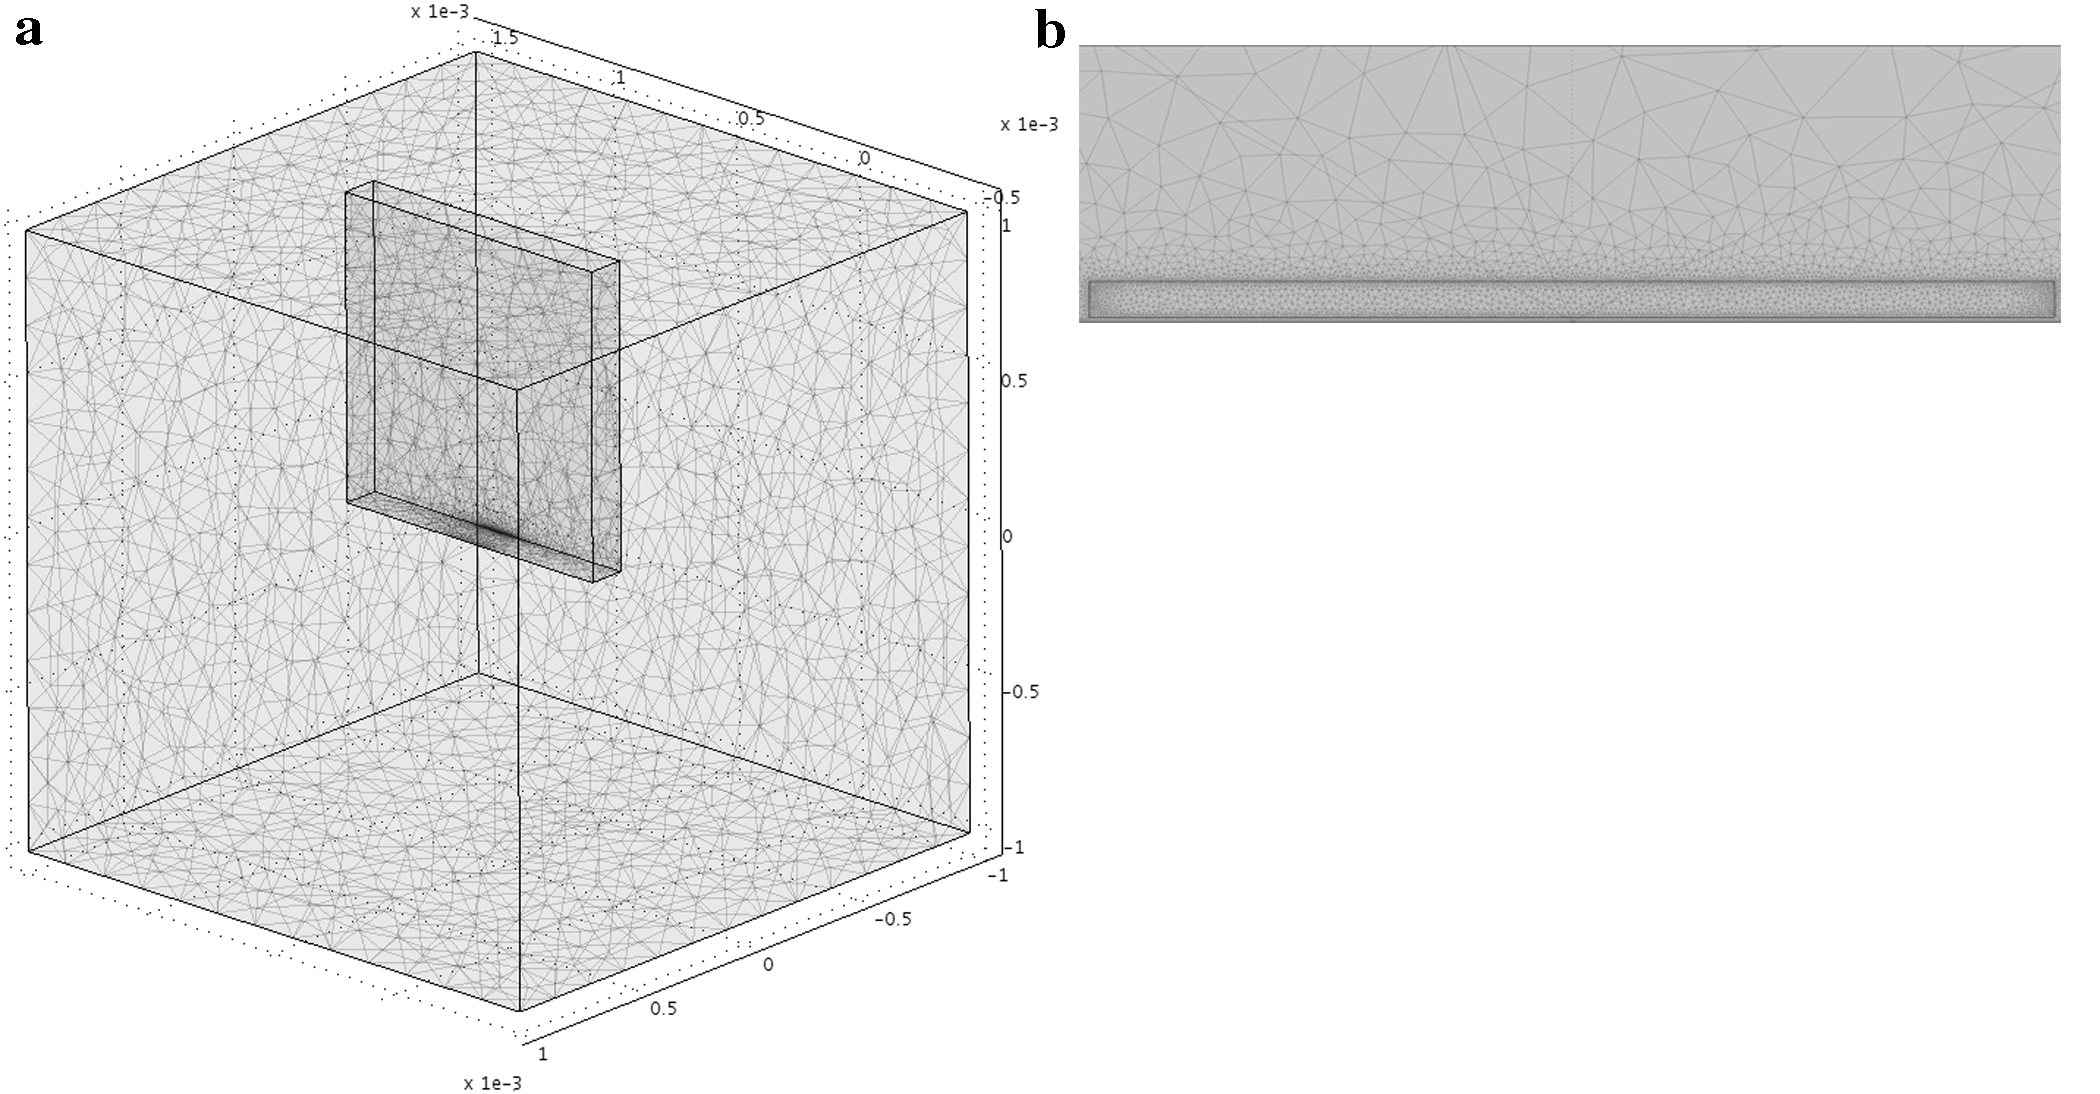


Figure SI-4. A general representation of a computational domain with mesh (a) and magnification of an exposed tip area (b).

The mesh size was refined down to the value of 100 nm at the edges of working electrode area (Figure SI-4b). The whole mesh consisted of 417,235 tetrahedral mesh elements. The model was solved in a dimensional form for 430,000 degrees of freedom assuming steady-state diffusion of electroactive species:

(SI-4-1)

where *Di* and *ci* are the diffusion coefficient and concentration of species *i*, respectively. We assume the electrochemical reaction of redox mediator *R* which takes place at the tip

(SI-4-2)

Consequently, reaction rate at the tip (*vtip*) is considered as

(SI-4-3)

with rate constant *k*1 = 106 m s-1and assuming initial bulk concentration of the redox mediator *c*o = 2 mM. In the present study we assume the equality of diffusion coefficients for both species *R* and *O*, *i.e. DR* = *DO* = 6.7 × 10-10 m2 s-1, which corresponds to the experimental diffusion coefficient of ferrocene methanol in water [2].

The boundary conditions employed in the FEM simulations are collected in the Table S-1

Table S-1. Boundary conditions for FEM simulations (**n** indicates the vector normal to the surface, *c** denotes the bulk mediator concentration).

| **Surface** | **Boundary condition** |
| --- | --- |
| Active surface of electrodes | Flux, **n**  *D**c*o*=-k1 c*o |
| Body of electrode | Insulation, -**n**  *D**c*o*=*0 |
| Box planes: top and sides | Concentration, *c*o*= c** |
| Box planes: bottom | Insulation, -**n**  *D**c*o*=*0 |

Numerical solution of the system of differential equations was made using a linear system solver (UMFPACK) and a relative error tolerance of 1 × 10-6.

**SI-5. Investigation of force and pressure by the soft probe on the sample**


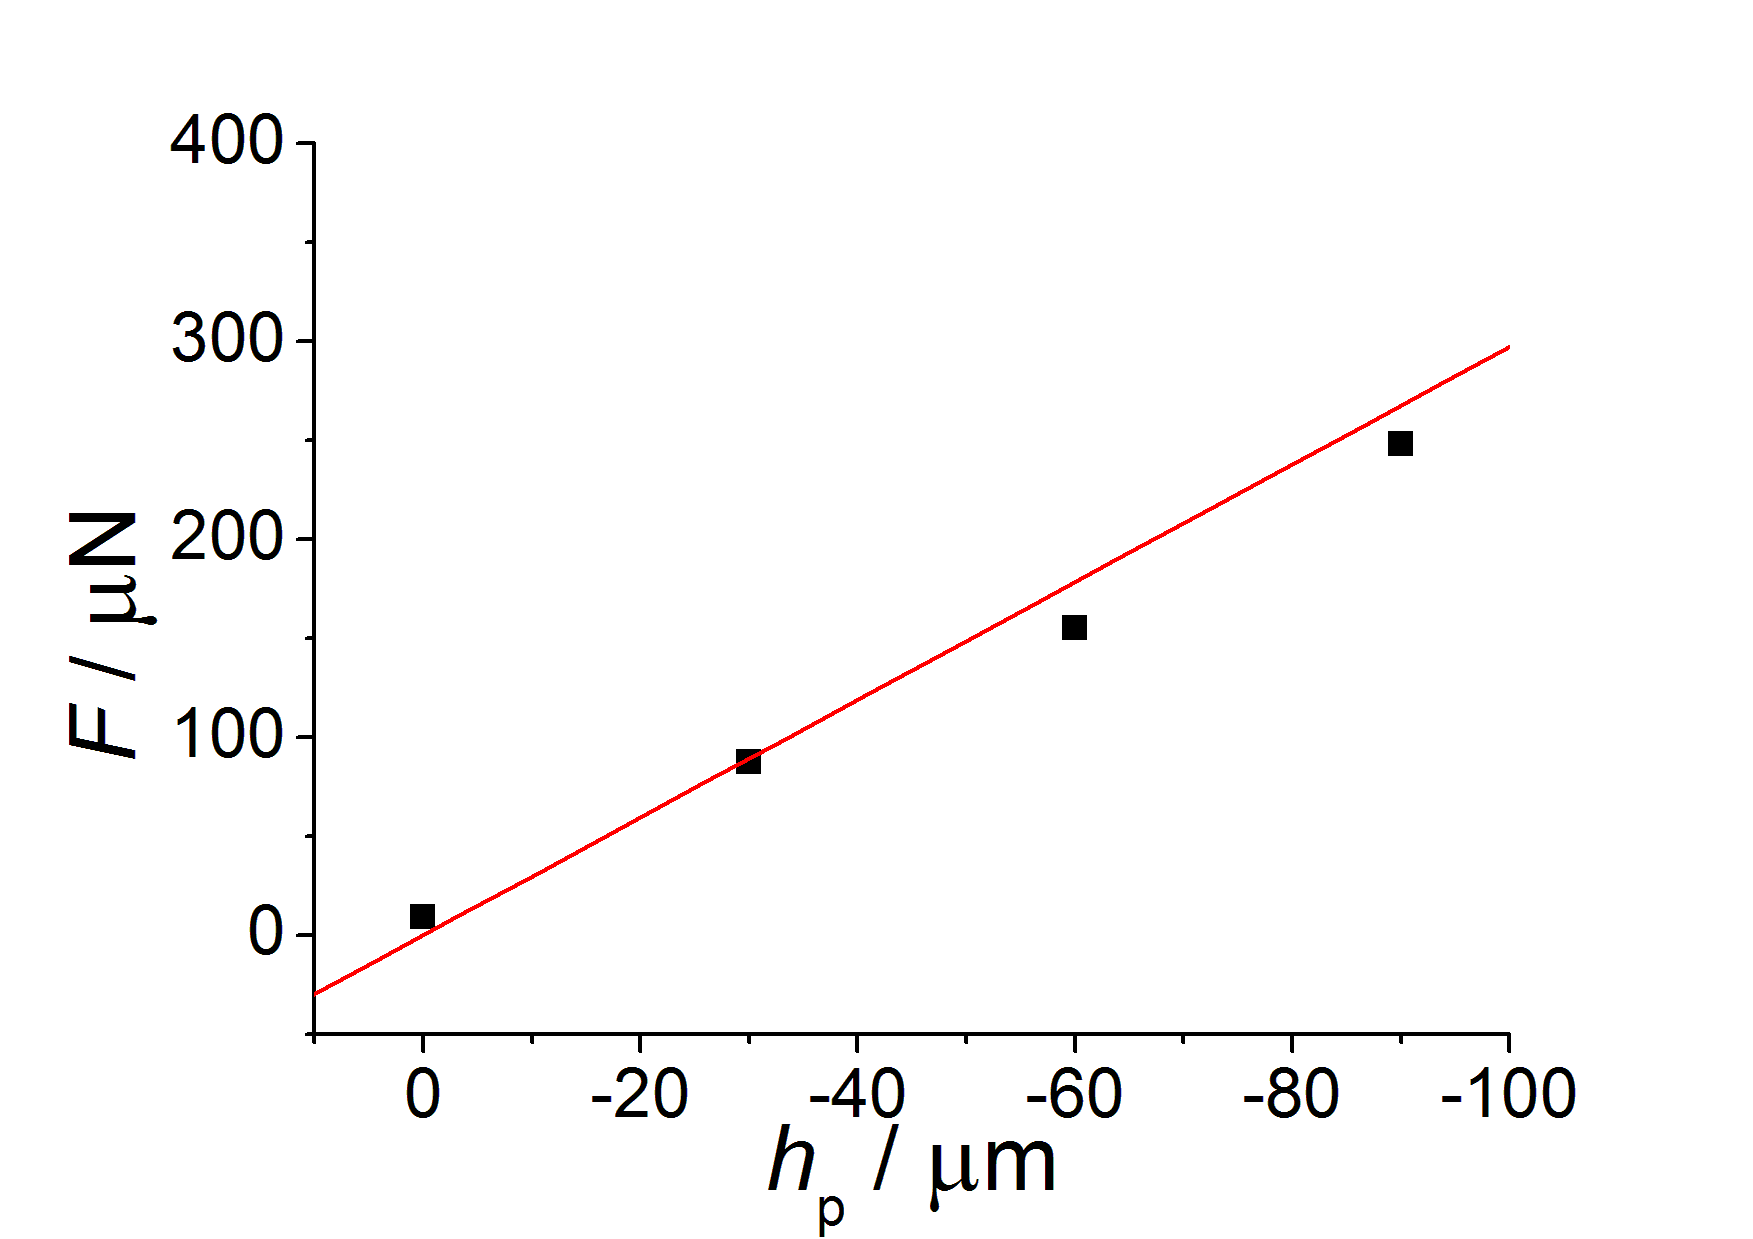


Figure SI-5-1. *F* plotted vs. *h*p for four displacements. Linear regression gives a linear equation with a slope *k* which is the spring constant of soft probe.

The force exerted by the soft probe on a sample was estimated by two independent approaches based on direct force measurement and the resonance frequency of the free vibration. First, the array was mounted on the custom-built holder with an inclination angle of 70° and was approached from air to an analytical balance plate with the *z* motor of a SPI positioning system. The force was measured by reading the mass display of the analytical balance Sartorius CP 124 S (used in place of a sample) for four vertical displacements *h*p and multiplying each value with the gravity constant (*g* = 9.81 m s-2). The measured force was plotted versus *h*p (Fig. SI-5-1). Linear regression through zero gives

(SI-5-1)

where *k* is the slope and represents the spring constant of the soft probe. With a displacement *h*p = -42.5 µm as used in the in the SECM experiments, the estimated force is 126.2 µN.

For determination of the resonance frequency a vibration of the soft probe was manually stimu­lated in air and the free vibration was monitored by the deflection of a HeNe Laser (632.8 nm, Thorlabs) directed towards a split photodiode. An oscilloscope was used to record the signal and a resonance fre­quency *f* = 18.25 Hz was determined. With this resonance frequency *f* the spring constant can be cal­culated with the mass of the vibrating part of the soft probe *m* = 0.07510-3 kg using equation (SI-5-2):

. (SI-5-2)

Therefore, the calculated force *F* with a displacement *h*p = -42.5 is 44.2µN.

For determination of the contact area the cross section of the soft arrays were imaged by scanning electron microscopy.


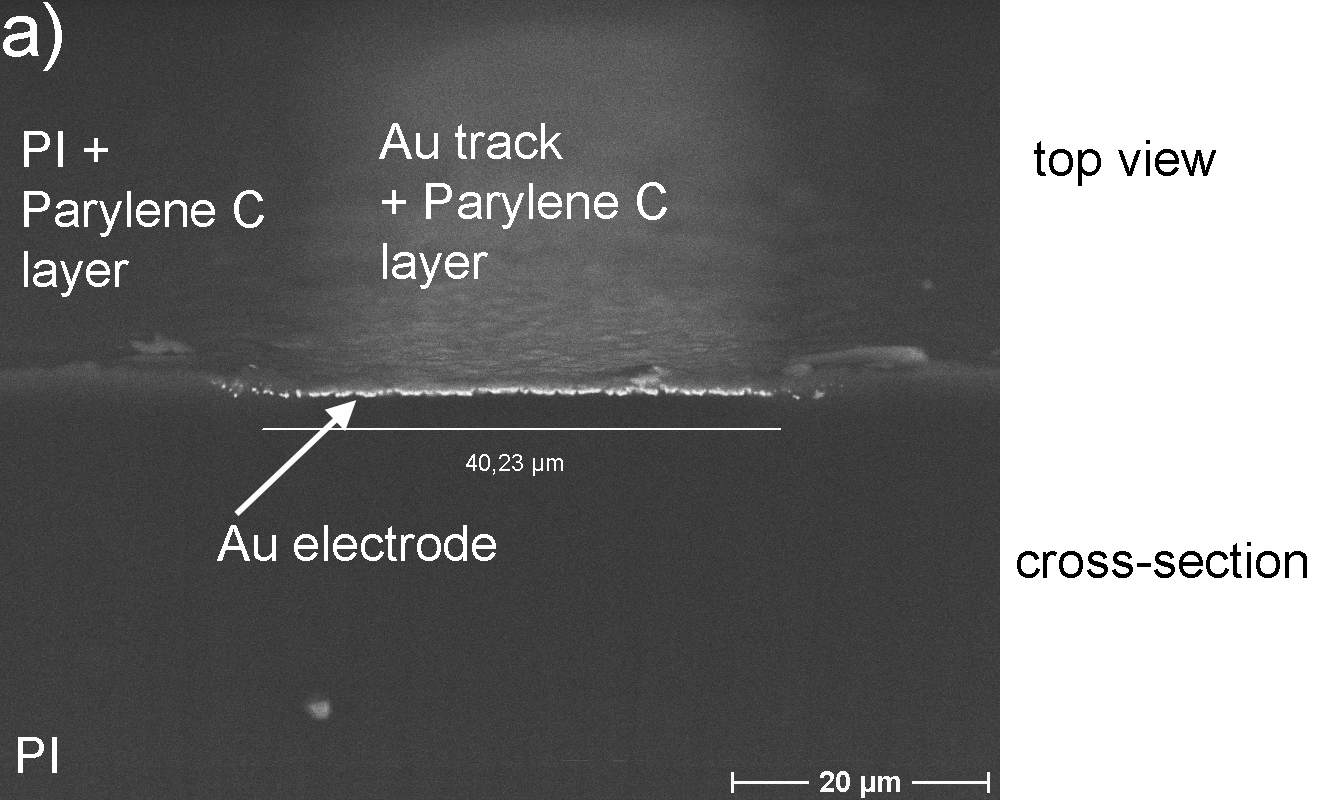


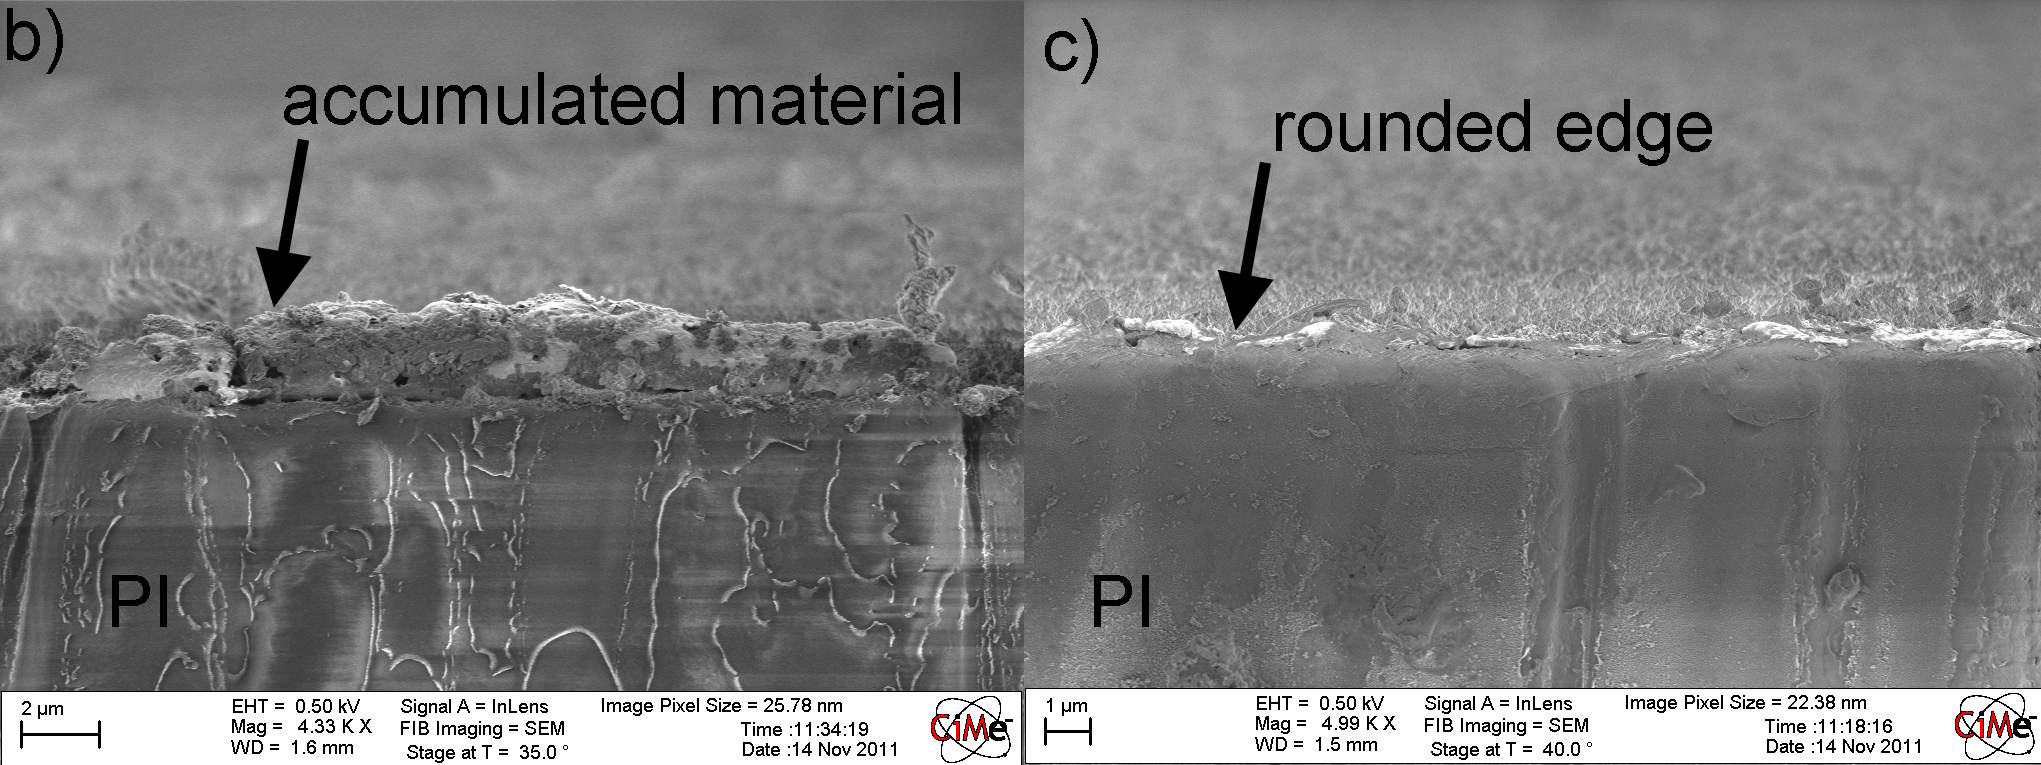


| d) |  |
| --- | --- |

Figure SI-5-2. SEM images of the upper part of soft probes (a-c) with the contact area to the sample facing upwards. View on the cross-section. The edge is in contact with the sample during SECM scanning. In all images the charging of the polymeric materials can be seen. SI-5-2a) shows the recessed active gold electrode area and the gold tracks covered by Parylene C coating after cutting with a razor blade. (b) SEM image after laser cutting and before SECM imaging. (c) SEM image after SECM imaging in contact mode. (d) Schematic representation of the soft probe in contact mode (not to scale). Contact area is given by deformation of the polymeric materials (left). Recessed electrode does not touch the sample (right).

Fig. SI-5-2 shows three SEM images of three probe cross-section. The edge which touched the sample during SECM imaging in contact mode is oriented towards the top of the Fig. SI-5-2. The probe was untreated for SEM which causes charging effects limiting the resolution. Fig. SI-5-2a shows the active gold electrode area and the gold tracks covered with the Parylene C layer after cutting with a razor blade. It can clearly been seen that the gold track is retracted vs. the plane of the surrounding Parylene C. That is fortunate as it prevents abrasion of the insulating Parylene C film above the gold tracks and prolongs the life time of the probes (Fig. SI 5-2d).

In Fig. SI-5-2b shows that the during laser-assisted cutting and melted material is accumulated on top of the polyimide film resulting in kind of a wall with almost 2 µm at selected positions. Therefore, some areas will be more in contact with the sample than others. After SECM scanning (4 h and 50 min) this inhomogeneous wall is abraded and a rounded edge can be seen (Fig. SI-5-2c). Areas that were in contact with the sample can also be easily identified by a flattened shape. The width of the contact area *w*cont can be estimated as 0.5 µm. The length of the array is 4 mm. Subtracting the recessed electrode areas the length *l*cont of the contact area of an array with 8 electrodes is *l*cont = 4000 µm - 8·40 µm = 3640 µm. The contact area is then calculated by *A*cont = *l*cont × *w*cont = 1840 µm2. Using the vertical force and the contact area allows the calculation of the vertical forces *p* = *F* / *A*cont which is 68.6 × 103 N m-2 and *p* = 24.0 × 103 N m-2 based on the direct force measurement or the use of the resonance frequency, respectively. These pressures are much less than those applied in conventional AFM imaging which is quoted as 1 nN on a contact area with a diameter of 2-10 nm [3] giving a pressure of *p* = 1.3 × 107 N m-2. We would like to remark that AFM forces and pressure can vary substantially depending on technique, cantilever and probe geometry and mechanical sample properties.

**References**

[1] C. G. Zoski, Ultramicroelectrodes: Design, Fabrication, and Characterization, Electroanalysis 14 (2002) 1041-1051.

[2] J. M. Saveant, N. Anicet, C. Bourdillon and J. Moiroux, Electron transfer in organized assemblies of biomolecules. Step-by-step avidin/biotin construction and dynamic characteristics of a spatially ordered multilayer enzyme electrode, J. Phys. Chem. B 102 (1998) 9844-9849.

[3] E. Meyer, H. J. Hug and R. Bennewitz, Scanning probe microscopy: the lab on a tip, Springer, Berlin [u.a.], 2004.
